# Supplementary material
Source: publisher site journal article supplement (https://www.dovepress.com/article/408718)
Supplement: Supplementary file 1 [file get_supplementary_file.php]

| **Supplementary Table 1: Summarization Of The Included Study** | | | | |
| --- | --- | --- | --- | --- |
| **Author(year)** | **Study object and sample** | **Study design** | **Sample size**  **TPTD(d)/control** | **Study outcome regarding osteosarcoma** |
| Gilsenan.A et.al(2021)[10] | To check for the use of TPTD in osteosarcoma patients in the USA. | Case series retrospective study. | 3(unknown)/1173 | Among the 1173 osteosarcoma patients, 3 of them have reported use of TPTD. |
| Midkiff.K et.al(2014)[11] | Evaluating osteosarcoma patients and checking for past TPTD exposure in Denmark, Finland, Iceland, Norway, and Sweden. | Case-series study retrospective. | 0 | Among 112 osteosarcoma patients, none of them have reported any use of TPTD prior to diagnose. |
| Glisenan.A et.al (2020) [4] | This study compared the incidence rate of osteosarcoma among patients aged ≥65years treated with teriparatide vs a matched comparator in USA population. | Prospective Cohort. | 153316/  613247 | 11 patients in the control group have developed osteosarcoma in compere to none in the teriparatide group. |
| Langdahl.B et.al (2016) [5] | Follow up of the patients that took TPTD in the following counters (Croatia, Denmark, France, Greece, Italy, Slovenia, and Sweden) and evaluating for any incidence of osteosarcoma among them. The was conducted in two phases, with the first evaluating taking TPTD for 24 months, and second phase was following up the patients for 18-24 months. | Prospective. | 1611 | None of them have developed osteosarcoma during neither, the initial phase nor the second phase. |
| Bang.U.C et.al(2014)[8] | Looking for the incidence of cancer among patients who takes rPTH(1-34 PTH or 1-84 PTH) in comparison to non-users. The study was conducted using Danish National Patient Registry. | retrospective cohort. | 4104(unknow)/40953 | No osteosarcoma cases in TPTD group compared to 9 cases in the other group. |
| Glisenan.A et.al (2021) [6] | Looking for any risk of developing osteosarcoma in TPTD patients in the past 15 years on a USA based population. | Prospective study. | 75247 /no control | None of them have developed osteosarcoma. |
| N**ishikawa** .A et.al (2016)[7] | postmarketing surveillance study assessing the safety and effectiveness of TPTD in patients with osteoporosis at high risk of fracture in Japan. | Prospective study. | 1847(20µ) | No reported cases of osteosarcoma. |
| Orwoll. ES et.al (2003) [14] | To assess the efficacy of TPTD, side effect profile, and different doses effect on a USA based population. | Randomized control trial. | 151(20µ)/139(40 µ)/147 placebo | No osteosarcoma cases have been identified in the case or control groups. |
| Body.J J et.al (2002) [12] | To assess the effectiveness of TPTD compared to alendronate. This study was conducted in the United States, Austria, Belgium, Canada, Israel, and Mexico from May 1997 through April 1999. | Randomized control trial. | 73(40µ)/73(10mg)” alendronate” | No osteosarcoma cases have been reported during the study in both group during the period of study 24 month. |
| Lindsay.R et.al (2004)[15] | To follow the patients after the randomized control trial conducted by Neer.R et al. in the USA | Randomized control trial followed up by prospective study. | 436(20µ)/412(40µ)/414 for follow up study. | No incidence of osteosarcoma in any of the three groups during the trial or during the follow up period. |
| Soen satoshi et.al (2017) [9] | Evaluating the effectiveness of TPTD among Japanese population with a follow up period for 24 months. | prospective, observational study of osteoporotic patients who were initiated on daily TPTD | 1996 included in the study. 1181 have completed the follow up period. Study discontinuation included lost-to-follow-up (508/815 = 62.3%), subject decision (150, 18.4%), investigator decision (116, 14.2%), adverse events (24, 2.9%), and death (17, 2.1%). | No incidence of osteosarcoma in the treatment group. |
| Neer R. et.al(2001)[23] | Randomized control trial to evaluate the effect of TPTD in bone fracturs. 1093 patients have taken TPTD with the dosage being either 20 or 40 micrograms. | Randomized control trial | 1093 patients | There was no evidence of any osteosarcoma cases after 24 months from the study initiation. |
